# Supplementary material
Source: PubMed Central journal article supplement (PMC5437843)
Supplement: NIHMS859858-supplement-Supplemental.pdf [file NIHMS859858-supplement-Supplemental.pdf]

## Supporting Information

---

### Globally Optimized Targeted Mass Spectrometry (GOT-MS):

### Reliable Metabolomics Analysis with Broad Coverage

Haiwei Gu<sup>1, 2+\*</sup>, Ping Zhang<sup>1, 3+</sup>, Jiangjiang Zhu<sup>1</sup>, and Daniel Raftery<sup>1, 4\*</sup>

<sup>1</sup>Northwest Metabolomics Research Center, Department of Anesthesiology and Pain Medicine, University of Washington, 850 Republican St., Seattle, WA 98109, USA

<sup>2</sup>Jiangxi Key Laboratory for Mass Spectrometry and Instrumentation, East China Institute of Technology, Nanchang, Jiangxi Province 330013, P. R. China

<sup>3</sup>Department of Applied Chemistry, China Agricultural University, Beijing 100193, P.R. China

<sup>4</sup>Public Health Sciences Division, Fred Hutchinson Cancer Research Center, 1100 Fairview Ave. N., Seattle, WA 98109, USA

---

**A Separate Excel Table: Table S1.** The list of GOT-MS MRMs. A few precursor and product ion pairs had similar molecular weight, but they were kept in the table because they had different optimized MS parameters (data not shown).

---

**Page S-3: Table S2.** Demographic and clinical information for the patients and healthy controls included in the CRC study.

**Page S-4: Table S3.** The concentrations of spiked U-<sup>13</sup>C<sup>15</sup>N-amino acids in the 1:4 dilution sample.

**Page S-5: Figure S1.** The general HILIC/RP-LC strategy for GOT-MS.

**Page S-6: Figure S2.** Typical RP C18-SIMs in the m/z range of 100-190 from a pooled serum sample under a) positive and b) negative ion detection modes in GOT-MS.

**Page S-7: Figure S3.** a) The intraday (n=3) and interday (n=3x3 consecutive days) CVs for amino acids detected by GOT-MS, b) the intraday (n=3) and interday (n=3x3 consecutive days) CVs of amino acids detected by GOT-MS, after normalization to the corresponding isotope labeled (U-<sup>13</sup>C<sup>15</sup>N-) internal standards, and c) the linearity (R<sup>2</sup>) of amino acids from the 5 dilution samples in GOT-MS.

29 **Page S-8: Figure S4.** a) The intraday (n=3) and interday (n=3x3 consecutive days) CVs  
30 of amino acids detected by Q-TOF-MS, b) the intraday (n=3) and interday (n=3x3  
31 consecutive days) CVs of amino acids detected by Q-TOF-MS, after normalization to the  
32 corresponding isotope labeled (U-<sup>13</sup>C<sup>15</sup>N-) internal standards, and c) the linearity (R<sup>2</sup>) of  
33 amino acids detected by Q-TOF-MS using the 5 dilution samples.

34 **Page S-9: Figure S5.** The flow chart of GOT-MS-based metabolomics for CRC  
35 diagnosis in this study.

36 **Page S-10: Figure S6.** The PCA score plot (PC1 vs. PC2) for the 155 GOT-MS MRMs  
37 collected from CRC and healthy control samples.

38 **Page S-11: Figure S7.** a) SIM scan of m/z 147 in GOT-MS, b) the MS/MS spectrum  
39 targeting the ions with m/z 147 at 4.4 min in a), c) MRM scan (147->130.1) of glutamine  
40 standard, and d) MRM scan (147->130.1) of lysine standard.

41 **Page S-12: Figure S8.** a) The MS/MS spectrum of lysine standard, and b) the MS/MS  
42 spectrum of glutamine standard.

43

44 **Table S2.** Demographic and clinical information for the patients and healthy controls  
 45 included in the CRC study.

|                                         | <b>Healthy Controls</b> | <b>CRC Patients</b> |
|-----------------------------------------|-------------------------|---------------------|
| <b>Subjects</b>                         | 20                      | 18                  |
| <b>Age</b> , median (range)             | 58 (21-78)              | 52 (27-76)          |
| <b>BMI<sup>a</sup></b> , median (range) | 27.4 (20.1-40.0)        | 27.0 (20.9-32.3)    |
| <b>Gender</b>                           |                         |                     |
| Male                                    | 11                      | 12                  |
| Female                                  | 9                       | 6                   |
| <b>Stage</b>                            |                         |                     |
| I/II                                    | -                       | 8                   |
| III                                     | -                       | 7                   |
| IV                                      | -                       | 3                   |
| <b>Ethnicity</b>                        |                         |                     |
| Caucasian                               | 18                      | 8                   |
| African American                        | -                       | 1                   |
| NA                                      | 2                       | 9                   |

46

47 <sup>a</sup>1 control and 9 CRC samples do not have BMI data.

48

49

50 **Table S3.** The concentrations of spiked U-<sup>13</sup>C<sup>15</sup>N-amino acids in the 1:4 dilution sample.

| U- <sup>13</sup> C <sup>15</sup> N-Amino Acids | Concentration (μM) |
|------------------------------------------------|--------------------|
| U- <sup>13</sup> C <sup>15</sup> N-Gly         | 87.6               |
| U- <sup>13</sup> C <sup>15</sup> N-Ala         | 93.2               |
| U- <sup>13</sup> C <sup>15</sup> N-Ser         | 39.2               |
| U- <sup>13</sup> C <sup>15</sup> N-Pro         | 58.6               |
| U- <sup>13</sup> C <sup>15</sup> N-Val         | 28.8               |
| U- <sup>13</sup> C <sup>15</sup> N-Thr         | 32.5               |
| U- <sup>13</sup> C <sup>15</sup> N-Leu         | 82.3               |
| U- <sup>13</sup> C <sup>15</sup> N-Ile         | 16.0               |
| U- <sup>13</sup> C <sup>15</sup> N-Asn         | 67.3               |
| U- <sup>13</sup> C <sup>15</sup> N-Asp         | 68.2               |
| U- <sup>13</sup> C <sup>15</sup> N-Gln         | 60.7               |
| U- <sup>13</sup> C <sup>15</sup> N-Lys         | 93.5               |
| U- <sup>13</sup> C <sup>15</sup> N-Glu         | 64.7               |
| U- <sup>13</sup> C <sup>15</sup> N-Met         | 14.2               |
| U- <sup>13</sup> C <sup>15</sup> N-His         | 6.7                |
| U- <sup>13</sup> C <sup>15</sup> N-Phe         | 11.2               |
| U- <sup>13</sup> C <sup>15</sup> N-Arg         | 56.4               |
| U- <sup>13</sup> C <sup>15</sup> N-Tyr         | 7.1                |
| U- <sup>13</sup> C <sup>15</sup> N-Trp         | 16.3               |
| U- <sup>13</sup> C <sup>15</sup> N-Cys         | 5.4                |

51

52

53

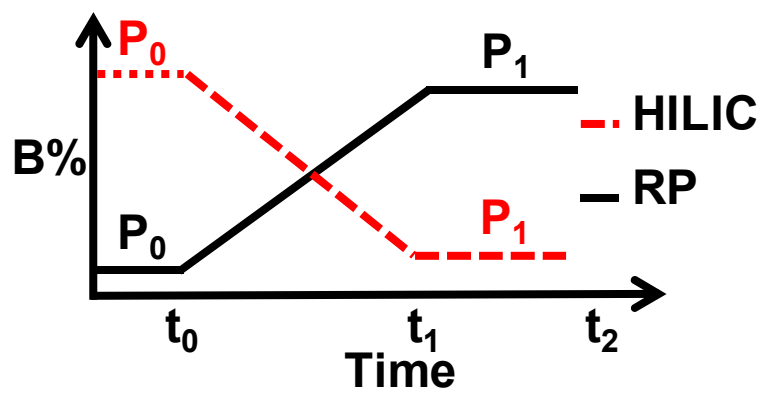

54

55 **Figure S1.** The general HILIC/RP-LC strategy for GOT-MS.

56

57

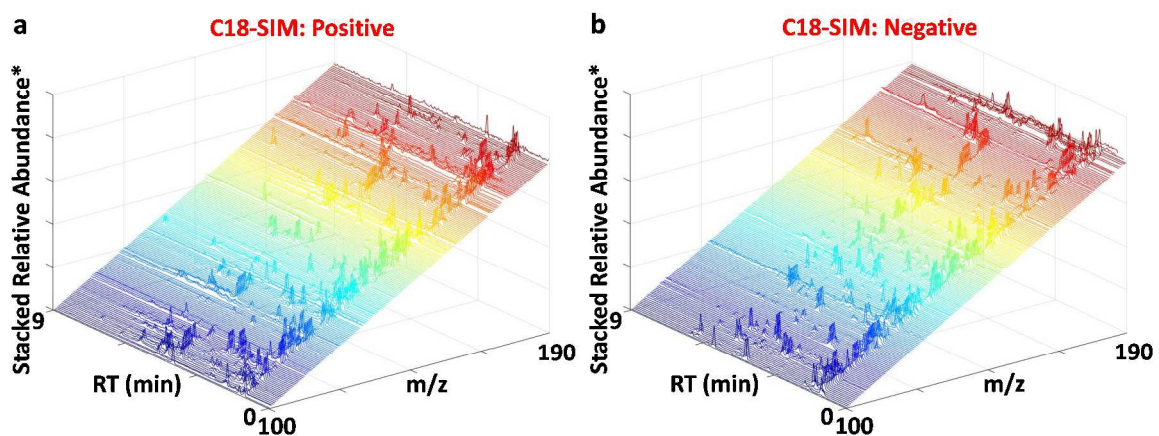

58

59 **Figure S2.** Typical RP C18-SIMs in the m/z range of 100-190 from a pooled serum  
60 sample under a) positive and b) negative ion detection modes in GOT-MS.

61 \* Each SIM data was first linearly scaled, so that the minimum is 0 and the maximum is  
62 1. An increment of 0.04 was then added to each SIM across different retention time.

63

64

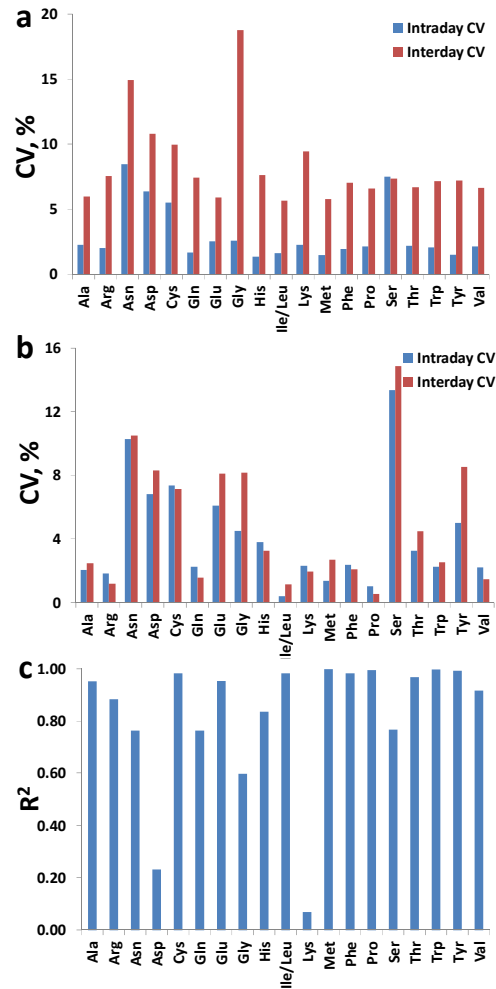

66

67 **Figure S3.** a) The intraday (n=3) and interday (n=3x3 consecutive days) CVs for amino  
 68 acids detected by GOT-MS, b) the intraday (n=3) and interday (n=3x3 consecutive days)  
 69 CVs of amino acids detected by GOT-MS, after normalization to the corresponding  
 70 isotope labeled (U-<sup>13</sup>C<sup>15</sup>N-) internal standards, and c) the linearity (R<sup>2</sup>) of amino acids  
 71 from the 5 dilution samples in GOT-MS.

72 \* Ile and Leu were integrated together since they had the same MRMs and baseline  
 73 separation between them was not observed.

74

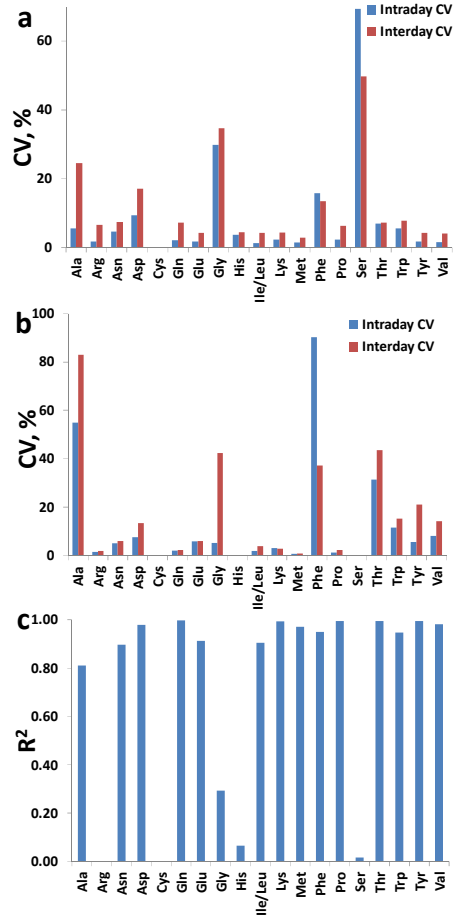

75

76 **Figure S4.** a) The intraday (n=3) and interday (n=3x3 consecutive days) CVs of amino  
 77 acids detected by Q-TOF-MS, b) the intraday (n=3) and interday (n=3x3 consecutive  
 78 days) CVs of amino acids detected by Q-TOF-MS, after normalization to the  
 79 corresponding isotope labeled (U-<sup>13</sup>C<sup>15</sup>N-) internal standards, and c) the linearity (R<sup>2</sup>) of  
 80 amino acids detected by Q-TOF-MS using the 5 dilution samples.

81 \* Ile and Leu were integrated together since they had the same MRMs and baseline  
 82 separation between them was not observed.

83 \*\* Cysteine was not detectable in these samples using Q-TOF.

84 \*\*\* U-<sup>13</sup>C<sup>15</sup>N-cysteine, U-<sup>13</sup>C<sup>15</sup>N-serine, and U-<sup>13</sup>C<sup>15</sup>N-histidine were not detectable in  
 85 these samples using Q-TOF.

86 \*\*\*\* R<sup>2</sup> for Arginine was very small.



87

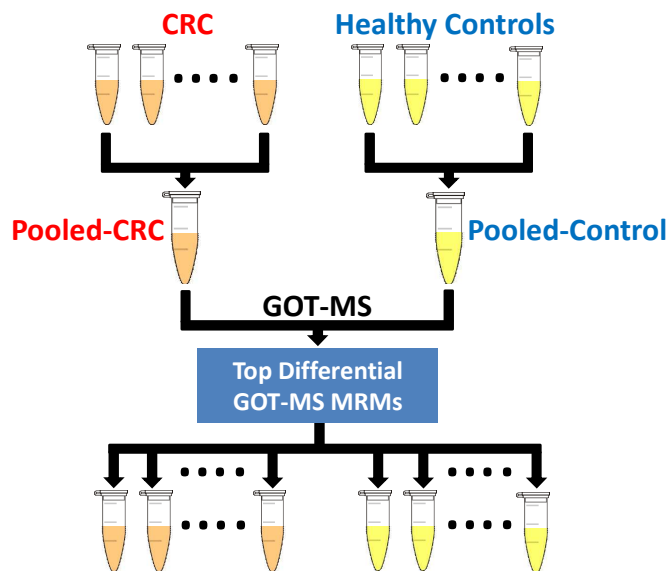

88

89 **Figure S5.** The flow chart of GOT-MS-based metabolomics for CRC diagnosis used in  
90 this study.

91

92

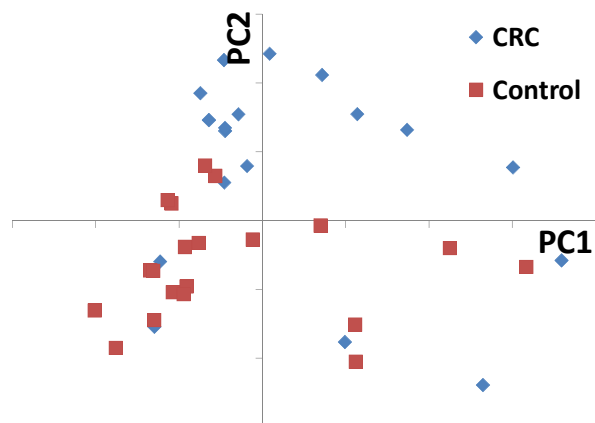

93

94 **Figure S6.** The PCA score plot (PC1 vs. PC2) for the 155 GOT-MS MRMs collected

95 from CRC and healthy control samples.

96

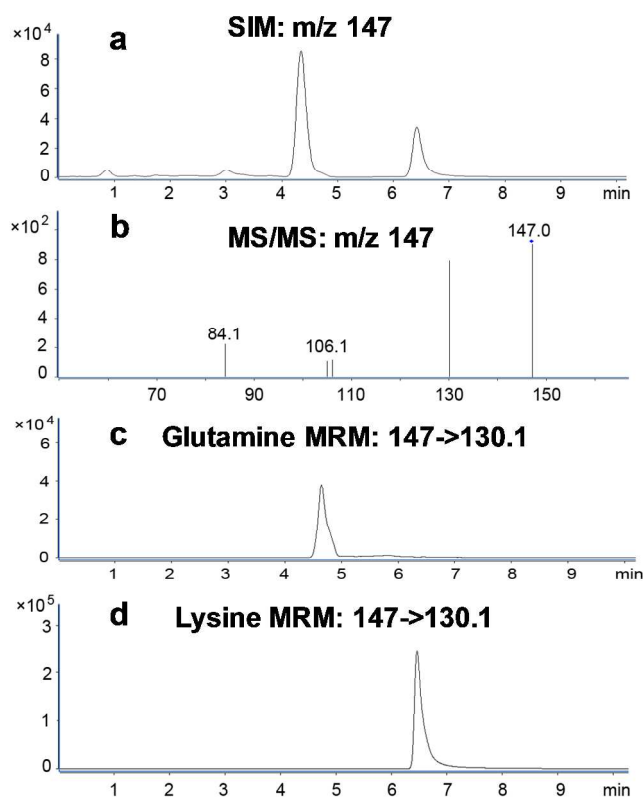

98

99 **Figure S7.** a) SIM scan of m/z 147 in GOT-MS, b) the MS/MS spectrum targeting the  
100 ions with m/z 147 at 4.4 min in a), c) MRM scan (147->130.1) of glutamine standard, and  
101 d) MRM scan (147->130.1) of lysine standard.

102

103

104

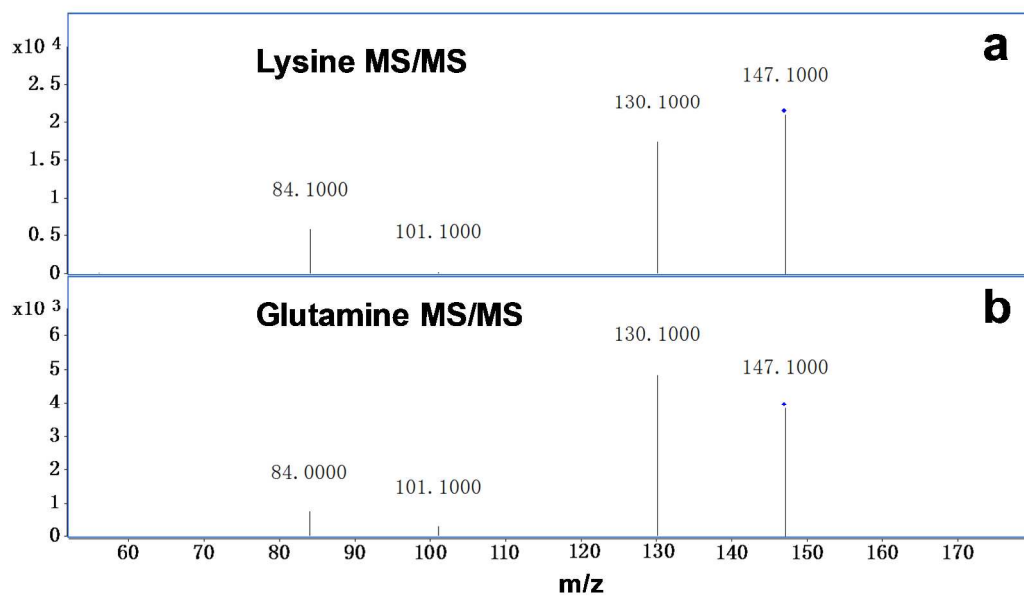

105

106 **Figure S8.** a) The MS/MS spectrum of lysine standard, and b) the MS/MS spectrum of  
107 glutamine standard.

108
